# Supplementary material for: Pou5f1/Oct4 Promotes Cell Survival via Direct Activation of mych Expression during Zebrafish Gastrulation
Source: PubMed Central journal article supplement (PMC3958507; doi:10.1371/journal.pone.0092356), 2014-03-18
Supplement: pone.0092356.s009.pdf [file pone.0092356.s009.pdf]

**Supplemental Table S2**

**Referring to: Figure 5**

**Analysis of the Mych contribution to the morphology of the MZspg mutant phenotype**

|                   |  | WT                         |    |                     |    | MZspg            |                 |    |
|-------------------|--|----------------------------|----|---------------------|----|------------------|-----------------|----|
|                   |  | 4.6 ng                     |    | 1.4 ng              |    | 112 pg           |                 |    |
| Number of Embryos |  | <i>mych</i> -SP-MO         | CO | <i>mych</i> -ATG-MO | CO | <i>mych</i> mRNA | <i>gfp</i> mRNA |    |
|                   |  | dead by 90% epiboly        | 3  | 2                   | 16 | 19               | 0               | 0  |
|                   |  | phenotype at 25 hpf: WT    | 56 | 66                  | 68 | 56               | -               | -  |
|                   |  | phenotype at 25 hpf: MZspg | -  | -                   | -  | -                | 94              | 92 |
|                   |  | embryos analyzed           | 59 | 68                  | 84 | 75               | 94              | 92 |
